# Supplementary material for: Evaluating the Onset, Severity, and Recovery of Changes to Smell and Taste Associated With COVID-19 Infection in a Singaporean Population (the COVOSMIA-19 Trial): Protocol for a Prospective Case-Control Study
Source: PubMed Central journal article supplement (PMC7781589; doi:10.2196/24797), 2020-12-31
Supplement: resprot_v9i12e24797_app2.pdf [file resprot_v9i12e24797_app2.pdf]

**Additional File 3: Daily smell and taste testing documents**

Daily Home-Use Test Instructions – page 2

Daily Testing Questionnaire – pages 3-9

Additional Questions – pages 10-13

## Daily Home-use Test & Follow-up Questionnaire

Please remember to complete the Test & Questionnaire at the same time every day

Please follow the instructions below to complete your daily self-reported questionnaire.

1.

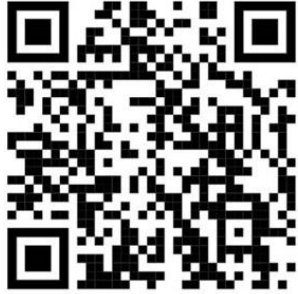

Please scan the QR code. This will bring you to the login page.

请扫描二维码 (QR code)。二维码会连接到登入网址。

কিউআর কোডটি স্ক্যান করুন এটি আপনাকে লগইন পৃষ্ঠায় নিয়ে আসবে।

QR குறியீட்டை ஸ்கேன் செய்யுங்கள். இது உங்களை உள்ளுழைவு பக்கத்திற்கு கொண்டு வரும்.

2.

Username & Password:

SCCTXXXX

You may login using the login information above.

您可以按照以上的用户名和密码来登入网站。

আপনি উপরের লগইন তথ্য ব্যবহার করে লগইন করতে পারেন।

மேலே உள்ள உள்ளுழைவு தகவலைப் பயன்படுத்தி நீங்கள் உள்ளுழையலாம்.

3.

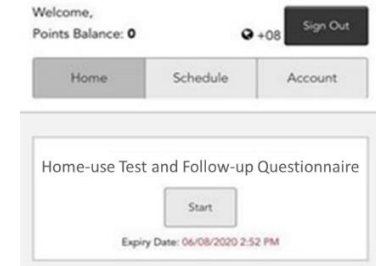

Please select 'Home-use Test and Follow-up Questionnaire'.

请选择'Home-use Test and Follow-up Questionnaire'。

আজকের স্ব-প্রতিবেদনিত প্রশ্নাবলী সম্পূর্ণ করতে দয়া করে 'Home-use Test and Follow-up Questionnaire' নির্বাচন করুন

'Home-use Test and Follow-up Questionnaire' என்பதைத் தேர்ந்தெடுக்கவும்.

Teaspoon / 茶匙/ चा चामच/ டீஸ்பூன்

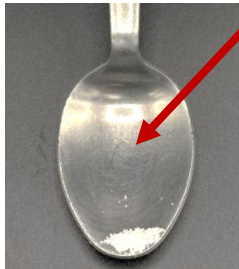

Sugar/ 糖/ চিনি/ சர்க்கரை

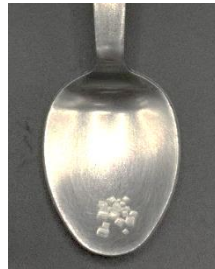

Salt/ 盐/ লবণ/ உப்பு

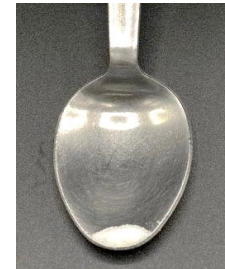

Lime Powder/ 酸酐粉/ লেবু গুঁড়ো /  
எலுமிச்சை பொடி

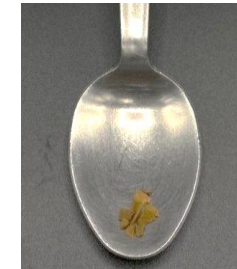

Coffee Powder/ 咖啡粉/  
கஃபி பாஊடர்/ காபி பொடியை

Please attach Odour Pen 1 here

Please attach Odour Pen 2 here

**Thank you [ID] for taking time to complete the self-reported questionnaire!**

**This questionnaire will be completed over a total of 28 days.**

**This is today's Self-Reported Questionnaire.**

**Since the last test, my sense of smell has...**

- Improved
- Stayed the same
- Worsened

**Please rate your sense of smell right now:**

|                             |  |                                       |
|-----------------------------|--|---------------------------------------|
| NO SENSE OF<br>SMELL AT ALL |  | EXTREMELY<br>STRONG SENSE OF<br>SMELL |
|-----------------------------|--|---------------------------------------|

**Since the last test, my sense of taste has...**

- Improved
- Stayed the same
- Worsened

**Please rate your sense of taste right now:**

|                             |  |                                       |
|-----------------------------|--|---------------------------------------|
| NO SENSE OF<br>TASTE AT ALL |  | EXTREMELY<br>STRONG SENSE OF<br>TASTE |
|-----------------------------|--|---------------------------------------|

**For each of the following categories of odour, please select 1 odour and indicate on the scale your perception of it.**

**Category 1:**

*Drop-down menu showing the options:*

- Orange
- Apple
- Watermelon
- Papaya
- Mango
- Banana
- Pineapple
- Fruit Jam

|        |        |            |
|--------|--------|------------|
|        |        |            |
| ABSENT | NORMAL | HEIGHTENED |



**Category 5:**

*Drop-down menu showing the options:*

- Cumin
- Five spice
- Lemon grass
- Ginger
- Chilli
- Garlic
- Sambal
- Cardamom
- Cinnamon

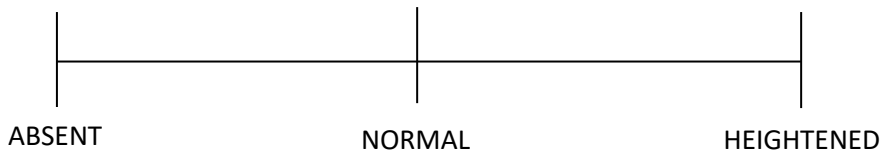

**Category 6:**

*Drop-down menu showing the options:*

- Vinegar
- Toothpaste/menthol
- Mustard
- Wasabi
- Cloves
- Vodka/Scotch

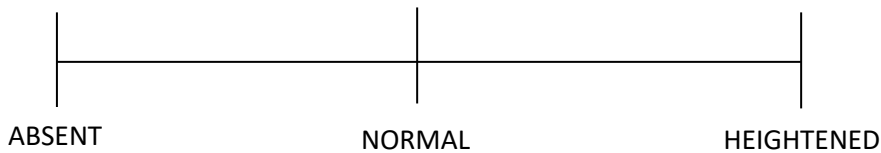

**The kind of items that I cannot smell or taste normally are:**

- I cannot smell/taste anything
- Foods/beverages (specify)
- Tobacco products (specify)
- Detergent/washing-up liquid/shampoo (specify)
- All of the above
- Other (specify)
- I can smell/taste everything

**You will now complete the smell test.**

**Please use your sniffing pens (2) to answer the subsequent questions.**

**Please take the first pen and open it.**

**Bring the pen about 3 inches from your nose (approximately the width of your hand).**

**Please sniff.**

**Do you smell it?**

- Yes. The smell is
- No

**The smell is...**

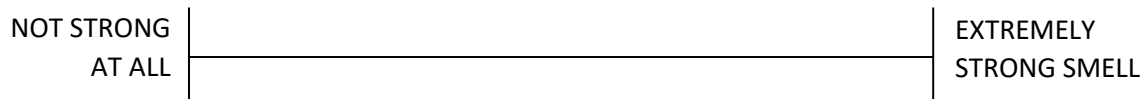

**Please take the second pen and open it.**

**Bring the pen about 3 inches from your nose (approximately the width of your hand).**

**Please sniff.**

**Do you smell it?**

- Yes. The smell is
- No

**The smell is...**

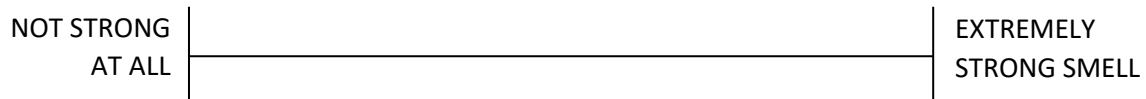

**You will now complete the taste test.**

**Please use the taste test items (4) to answer the subsequent questions.**

**Please take a small amount of salt to the tip end of your tongue with a small spoon to taste.**

**Do you taste it?**

- Yes
- No

**The taste is...**

|                      |  |                           |
|----------------------|--|---------------------------|
| NOT STRONG<br>AT ALL |  | EXTREMELY<br>STRONG SMELL |
|----------------------|--|---------------------------|

**Please take a small amount of sugar to the tip end of your tongue with a small spoon to taste.**

**Do you taste it?**

- Yes
- No

**The taste is...**

|                      |  |                           |
|----------------------|--|---------------------------|
| NOT STRONG<br>AT ALL |  | EXTREMELY<br>STRONG SMELL |
|----------------------|--|---------------------------|

**Please take a small amount of sour plum powder to the tip end of your tongue with a small spoon to taste.**

**Do you taste it?**

- Yes
- No

**The taste is...**

|                      |  |                           |
|----------------------|--|---------------------------|
| NOT STRONG<br>AT ALL |  | EXTREMELY<br>STRONG SMELL |
|----------------------|--|---------------------------|

Please take a small amount of coffee powder to the tip end of your tongue with a small spoon to taste.

Do you taste it?

- Yes
- No

The taste is...

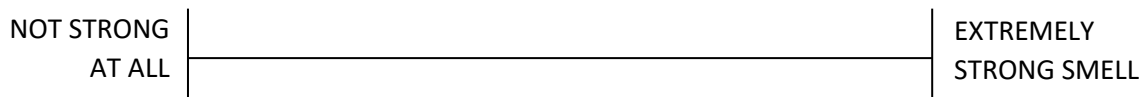

Please select all the symptoms you have experienced in the last 24 hours:

*Please tick all that apply.*

- Smell loss (total)
- Smell loss (partial)
- Diminished taste
- No other symptoms
- High temperature (fever)
- Chills
- Dry cough
- Cough with mucus
- Nasal congestion
- Runny nose
- Difficulty breathing
- Sore throat
- Muscle aches
- Fatigue
- Diarrhoea
- Abdominal pain
- Headache
- Eye itchiness
- Vomiting/Nausea
- Other (Please Specify):

Is there anything else you wish to share?

.....  
.....  
.....



.....

**Thank you for completing Day [X]'s self-reported questionnaire.**

**Please come back again, same time, tomorrow to complete the questionnaire again.**

**You may click '*Pause*' below to exit.**

**Since your taste or smell problem began, your appetite has been:**

- I do not have a taste or smell problem
- Better
- Unchanged
- Worse

**Since your taste or smell problem began, you have enjoyed food:**

- I do not have a taste or smell problem
- More
- The same
- Less

**Does your taste or smell problem affect the way you eat (e.g., types of foods, meal, and snacking frequency)?**

- I do not have a taste or smell problem
- No
- Yes (Describe Change):

**Since your taste or smell problem began, have you altered the amount of salt, sugar or spices you add to your food?**

- I do not have a taste or smell problem
- No
- Yes (Describe Change):

**Since your taste or smell problem began, have you started to strongly dislike or avoid certain foods?**

- I do not have a taste or smell problem
- No
- Yes (Specify foods):

**Since your taste or smell problem began, have you had a strong desire or craving for certain foods?**

- I do not have a taste or smell problem
- No
- Yes (Specify foods):

**Do you feel nauseated or sick to your stomach often?**

- No
- Yes

~~~~~SKIP LOGIC~~~~~

YES

**How severely?**

- Mildly
- Extremely

**When?**

**NO:**

*Skip to following question.*

**Since your taste or smell problem began, your weight has:**

- I do not have a taste/smell problem
- Increased (Please specify change (kg)):
- Remained unchanged
- Decreased (Please specify change (kg)):

~~~~~SKIP LOGIC~~~~~

Increased/Decreased:

**Was the change in your weight due to your taste or smell problem?**

- I have not experienced a weight change
- No (Specify cause):
- Yes (Specify cause):

**Remained unchanged/I do not have a taste/smell problem:**

*Skip to following question.*

Your current weight is  (kg)  
Your current height is  (m)

**Because of my loss of smell/taste...**

|                                                  | <b>STRONGLY DISAGREE</b> | <b>DISAGREE</b> | <b>DISAGREE SOMEWHAT</b> | <b>NEITHER AGREE NOR DISAGREE</b> | <b>AGREE SOMEWHAT</b> | <b>AGREE</b> | <b>STRONGLY AGREE</b> |
|--------------------------------------------------|--------------------------|-----------------|--------------------------|-----------------------------------|-----------------------|--------------|-----------------------|
| <b>I no longer enjoy the taste of my food</b>    |                          |                 |                          |                                   |                       |              |                       |
| <b>I no longer enjoy the smell of my food</b>    |                          |                 |                          |                                   |                       |              |                       |
| <b>I no longer enjoy cooking /preparing food</b> |                          |                 |                          |                                   |                       |              |                       |
| <b>I no longer enjoy eating food</b>             |                          |                 |                          |                                   |                       |              |                       |
| <b>I find it difficult to eat food</b>           |                          |                 |                          |                                   |                       |              |                       |
| <b>I find meals boring</b>                       |                          |                 |                          |                                   |                       |              |                       |

**Have you consulted your GP/another healthcare professional about your loss of sense of smell/taste?**

- Yes
- No

~~~~~SKIP LOGIC~~~~~

**YES:**

**Did this lead to any treatment for the loss of sense of smell/taste?**

- Yes
- No

**Did you receive any medication prescription?**

- Yes (Please specify):
- No

**NO:**

*Skip to following question.*

**Have you sought advice from other platforms (e.g. social media, charities)?**

- Yes (Please specify):
- No

**If there is anything else you would like to tell us about how your loss of sense of smell and taste has affected you or your eating habits, please use the space below:**

.....

.....

.....

.....

.....
