# Supplementary material for: Evaluating the Onset, Severity, and Recovery of Changes to Smell and Taste Associated With COVID-19 Infection in a Singaporean Population (the COVOSMIA-19 Trial): Protocol for a Prospective Case-Control Study
Source: PubMed Central journal article supplement (PMC7781589; doi:10.2196/24797), 2020-12-31
Supplement: resprot_v9i12e24797_app3.pdf [file resprot_v9i12e24797_app3.pdf]

Table S2. Questionnaire items and their source

| <i>QUESTIONNAIRE</i> | <i>QUESTION CONTENT</i>                         | <i>RELEVANCE</i> | <i>SOURCE</i>                                                                   |
|----------------------|-------------------------------------------------|------------------|---------------------------------------------------------------------------------|
| SSTQ                 | Gender                                          | Demographics     | Self-devised                                                                    |
| SSTQ                 | Age                                             | Demographics     | Self-devised                                                                    |
| SSTQ                 | Highest education status                        | Demographics     | Self-devised                                                                    |
| SSTQ                 | Nationality                                     | Demographics     | Self-devised                                                                    |
| SSTQ                 | Ethnicity                                       | Demographics     | Self-devised                                                                    |
| SSTQ                 | Singapore employment status                     | Demographics     | Self-devised                                                                    |
| SSTQ                 | Smoking status                                  | Demographics     | Self-devised                                                                    |
| SSTQ                 | Vaping status                                   | Demographics     | Self-devised                                                                    |
| SSTQ                 | Medication (Y/N)                                | General health   | Self-devised                                                                    |
| SSTQ                 | Medical condition(s)                            | General health   | GCCR [1]                                                                        |
| SSTQ                 | Symptoms (list) <sup>a</sup>                    | COVID-19         | Columbia University Irving Medical Centre COVID-19 symptom assessment/ GCCR [1] |
| SSTQ                 | First experience of symptoms                    | COVID-19         | Self-devised                                                                    |
| SSTQ                 | Anosmia (Y/N)                                   | Smell            | Self-devised                                                                    |
| SSTQ                 | Anosmia (when?)                                 | Smell            | American Academy of Otolaryngology COVID-19 Anosmia reporting tool [2]          |
| SSTQ                 | Anosmia (onset in relation to other symptoms)   | Smell            | Spinato et al. [3]                                                              |
| SSTQ                 | Dysgeusia (Y/N)                                 | Taste            | Self-devised                                                                    |
| SSTQ                 | Dysgeusia (when?)                               | Taste            | American Academy of Otolaryngology COVID-19 Anosmia reporting tool [2]          |
| SSTQ                 | Dysgeusia (onset in relation to other symptoms) | Taste            | Spinato et al. [3]                                                              |
| SSTQ                 | Other symptoms (before smell or taste loss)     | COVID-19         | Self-devised                                                                    |
| SSTQ                 | Symptoms (list)                                 | COVID-19         | Columbia University Irving Medical Centre COVID-19 symptom assessment/ GCCR [1] |
| SSTQ                 | Symptoms (at the time of smell/taste loss)      | COVID-19         | Columbia University Irving Medical Centre COVID-19 symptom assessment/ GCCR [1] |

|      |                                                         |                                  |                                                                                                |
|------|---------------------------------------------------------|----------------------------------|------------------------------------------------------------------------------------------------|
| SSTQ | Problems with ability to smell                          | Smell                            | Smell Change Status Check (SCSC) [4,5]                                                         |
| SSTQ | Duration of problem with ability to smell               | Smell                            | Smell Change Status Check (SCSC) [4,5]                                                         |
| SSTQ | Ratings of ability to smell before/during/after illness | Smell                            | GCCR [1]                                                                                       |
| SSTQ | Blockage of nose before/during/after illness            | Smell                            | GCCR [1]                                                                                       |
| SSTQ | Fluctuations in sense of smell                          | Smell                            | GCCR [1]                                                                                       |
| SSTQ | Sense of smell since illness                            | Smell                            | GCCR [1]                                                                                       |
| SSTQ | Rated sense of smell                                    | Smell                            | Self-devised                                                                                   |
| SSTQ | Problems with ability to taste                          | Taste                            | Smell Change Status Check (SCSC) [4,5]                                                         |
| SSTQ | Duration of problem with ability to taste               | Taste                            | Smell Change Status Check (SCSC) [4,5]                                                         |
| SSTQ | Ratings of ability to taste before/during/after illness | Taste                            | GCCR [1]                                                                                       |
| SSTQ | Any other changes to taste (Y/N)                        | Taste                            | GCCR [1]                                                                                       |
| SSTQ | Tastes affected                                         | Taste                            | GCCR [1]                                                                                       |
| SSTQ | Rated sense of Taste                                    | Taste                            | Self-devised                                                                                   |
| SSTQ | Appetite                                                | Eating behaviour and appetite Qs | Modified Monell-Jefferson Taste & Smell Questionnaire, Section 3 (Nutritional Information) [6] |
| SSTQ | Enjoyment of Food                                       | Eating behaviour and appetite Qs | Modified Monell-Jefferson Taste & Smell Questionnaire, Section 3 (Nutritional Information) [6] |
| SSTQ | Effect on eating behaviours                             | Eating behaviour and appetite Qs | Modified Monell-Jefferson Taste & Smell Questionnaire, Section 3 (Nutritional Information) [6] |
| SSTQ | Altered salt/sugar/spice added to food                  | Eating behaviour and appetite Qs | Modified Monell-Jefferson Taste & Smell Questionnaire, Section 3 (Nutritional Information) [6] |
| SSTQ | Changes in liking                                       | Eating behaviour and appetite Qs | Modified Monell-Jefferson Taste & Smell Questionnaire, Section 3 (Nutritional Information) [6] |
| SSTQ | Changes in craving                                      | Eating behaviour and appetite Qs | Modified Monell-Jefferson Taste & Smell Questionnaire, Section 3 (Nutritional Information) [6] |
| SSTQ | Nauseated (Y/N)                                         | Eating behaviour and appetite Qs | Modified Monell-Jefferson Taste & Smell Questionnaire, Section 3 (Nutritional Information) [6] |
| SSTQ | Nauseated (severity)                                    | Eating behaviour and appetite Qs | Modified Monell-Jefferson Taste & Smell Questionnaire, Section 3 (Nutritional Information) [6] |

|         |                                                                   |                                  |                                                                                                |
|---------|-------------------------------------------------------------------|----------------------------------|------------------------------------------------------------------------------------------------|
| SSTQ    | Weight changes                                                    | Eating behaviour and appetite Qs | Modified Monell-Jefferson Taste & Smell Questionnaire, Section 3 (Nutritional Information) [6] |
| SSTQ    | Weight and smell/taste problem                                    | Eating behaviour and appetite Qs | Modified Monell-Jefferson Taste & Smell Questionnaire, Section 3 (Nutritional Information) [6] |
| SSTQ    | Self-reported weight and height                                   | Eating behaviour and appetite Qs | Self-devised                                                                                   |
| SSTQ    | Loss of smell/taste and eating related QoL (matrix)               | Eating behaviour and appetite Qs | Self-devised                                                                                   |
| SSTQ    | Additional comments (free text response)                          | General                          | Self-devised                                                                                   |
| SSTQ    | Symptoms (last 24 hours)                                          | COVID-19                         | Columbia University Irving Medical Centre COVID-19 symptom assessment/ GCCR [1]                |
| SNOT-22 | Symptoms and social/emotional consequences of nasal disorder      | Smell                            | Hopkins et al. [7]                                                                             |
| HUT     | Sense of smell (improvement)                                      | Smell                            | Self-devised                                                                                   |
| HUT     | Sense of smell (rating)                                           | Smell                            | Self-devised                                                                                   |
| HUT     | Sense of taste (improvement)                                      | Taste                            | Self-devised                                                                                   |
| HUT     | Sense of taste (rating)                                           | Taste                            | Self-devised                                                                                   |
| HUT     | Odours (Category 1)<br>(absent/normal/heightened)<br><sub>b</sub> | Smell                            | Weizmann Smell tracker [8]                                                                     |
| HUT     | Odours (Category 2)<br>(absent/normal/heightened)<br><sub>b</sub> | Smell                            | Weizmann Smell tracker [8]                                                                     |
| HUT     | Odours (Category 3)<br>(absent/normal/heightened)<br><sub>b</sub> | Smell                            | Weizmann Smell tracker [8]                                                                     |
| HUT     | Odours (Category 4)<br>(absent/normal/heightened)<br><sub>b</sub> | Smell                            | Weizmann Smell tracker [8]                                                                     |
| HUT     | Odours (Category 5)<br>(absent/normal/heightened)<br><sub>b</sub> | Smell                            | Weizmann Smell tracker [8]                                                                     |
| HUT     | Odours (Category 6)<br>(absent/normal/heightened)<br><sub>b</sub> | Smell                            | Weizmann Smell tracker [8]                                                                     |
| HUT     | Foods I cannot smell/taste                                        | Smell/Taste                      | Modified Monell-Jefferson Taste & Smell Questionnaire, Section 1 [6]                           |
| HUT     | Smell test (2 odour pens)                                         | Smell                            | [Similar to testing procedure/questions used by]: Yale Smell Loss Survey [9]                   |
| HUT     | Taste test (4 items)                                              | Taste                            | [Similar to testing procedure/questions used by]: Yale Smell Loss Survey [9]                   |

|                  |                                                            |                                  |                                                                                                |
|------------------|------------------------------------------------------------|----------------------------------|------------------------------------------------------------------------------------------------|
| HUT <sup>c</sup> | Appetite                                                   | Eating behaviour and appetite Qs | Modified Monell-Jefferson Taste & Smell Questionnaire, Section 3 (Nutritional Information) [6] |
| HUT <sup>c</sup> | Enjoyment of Food                                          | Eating behaviour and appetite Qs | Modified Monell-Jefferson Taste & Smell Questionnaire, Section 3 (Nutritional Information) [6] |
| HUT <sup>c</sup> | Effect on eating behaviours                                | Eating behaviour and appetite Qs | Modified Monell-Jefferson Taste & Smell Questionnaire, Section 3 (Nutritional Information) [6] |
| HUT <sup>c</sup> | Altered salt/sugar/spice added to food                     | Eating behaviour and appetite Qs | Modified Monell-Jefferson Taste & Smell Questionnaire, Section 3 (Nutritional Information) [6] |
| HUT <sup>c</sup> | Changes in liking                                          | Eating behaviour and appetite Qs | Modified Monell-Jefferson Taste & Smell Questionnaire, Section 3 (Nutritional Information) [6] |
| HUT <sup>c</sup> | Changes in craving                                         | Eating behaviour and appetite Qs | Modified Monell-Jefferson Taste & Smell Questionnaire, Section 3 (Nutritional Information) [6] |
| HUT <sup>c</sup> | Nauseated (Y/N)                                            | Eating behaviour and appetite Qs | Modified Monell-Jefferson Taste & Smell Questionnaire, Section 3 (Nutritional Information) [6] |
| HUT <sup>c</sup> | Nauseated (severity)                                       | Eating behaviour and appetite Qs | Modified Monell-Jefferson Taste & Smell Questionnaire, Section 3 (Nutritional Information) [6] |
| HUT <sup>c</sup> | Weight changes                                             | Eating behaviour and appetite Qs | Modified Monell-Jefferson Taste & Smell Questionnaire, Section 3 (Nutritional Information) [6] |
| HUT <sup>c</sup> | Weight and smell/taste problem                             | Eating behaviour and appetite Qs | Modified Monell-Jefferson Taste & Smell Questionnaire, Section 3 (Nutritional Information) [6] |
| HUT <sup>c</sup> | Self-reported weight and height                            | Eating behaviour and appetite Qs | Self-devised                                                                                   |
| HUT <sup>c</sup> | Loss of smell/taste and eating related QoL (matrix)        | Eating behaviour and appetite Qs | Self-devised                                                                                   |
| HUT <sup>c</sup> | GP consulted (Y/N)                                         | General                          | Self-devised                                                                                   |
| HUT <sup>c</sup> | Treatment for Smell/Taste (Y/N)                            | General                          | Self-devised                                                                                   |
| HUT <sup>c</sup> | Medication prescribed (Y/N)                                | General                          | Self-devised                                                                                   |
| HUT <sup>c</sup> | Advice from other platforms (Y/N)                          | General                          | Self-devised                                                                                   |
| HUT <sup>c</sup> | Additional comments about smell/taste (free text response) | General                          | Self-devised                                                                                   |
| HUT              | Symptoms (last 24 hours)                                   | COVID-19                         | Columbia University Irving Medical Centre COVID-19 symptom assessment/ GCCR [1]                |
| HUT              | Additional comments (free text response)                   | General                          | Self-devised                                                                                   |

Abbreviations are Singapore Smell and Taste Questionnaire (SSTQ), 2-item Sino-Nasal Outcome Test (SNOT-22), and Home-Use Test (HUT). <sup>a</sup> Although both had a similar symptoms list, we favoured the wording of the GCCR, as we believe this would be more easily understood by laypersons (i.e. less medical jargon). <sup>b</sup> Note, we use this to assess participants' self-reported perception of this smell; they were not required to find this household item and smell it (as in Iravani et al. (2020)). Also, we changed some of the items from the original categories for household items that are relatively common in Singapore. <sup>c</sup> These questions were only included in the extended version of the home-use test, which participants answered weekly.

### **References**

1. Global Consortium for Chemosensory Research. GCCR Survey. Published 2020. Accessed July 10, 2020. <https://sites.google.com/view/gcchemosensr/>
2. American Academy of Otolaryngology - Head and Neck Surgery. COVID-19 Anosmia Reporting Tool. Published 2020. Accessed November 13, 2020. <https://www.entnet.org/content/reporting-tool-patients-anosmia-related-covid-19>
3. Spinato G, Fabbris C, Polesel J. Alterations in Smell or Taste in Mildly Symptomatic Outpatients With SARS-CoV-2 Infection. *JAMA*. 2020;323(20):1-3. doi:10.1056/NEJMoa2005412
4. Greenberg MS, Gilbert AN. *The SMELL CHANGE STATUS CHECK (SCSC) A Rapid Verbal Screening Tool for Assessing Recent Change in Smell Function during COVID-19 Evaluations By.*; 2020.
5. NHANES. 2011-2012 Data Documentation, Codebook, and Frequencies: Taste & Smell (CSQ\_G). Published 2013. Accessed July 9, 2020. [https://wwwn.cdc.gov/Nchs/Nhanes/2011-2012/CSQ\\_G.htm](https://wwwn.cdc.gov/Nchs/Nhanes/2011-2012/CSQ_G.htm)
6. The Asthma Centre. Modified Monell-Jefferson Taste & Smell Questionnaire.

Published 2020. Accessed November 13, 2020. <http://www.asthmacenter.com/wp-content/uploads/Monell-Jefferson-Taste-Smell-Questionnaire.pdf>

7. Hopkins C, Gillett S, Slack R, Lund VJ, Browne JP. Psychometric validity of the 22-item Sinonasal Outcome Test. *Clin Otolaryngol*. 2009;34(5):447-454.  
doi:10.1111/j.1749-4486.2009.01995.x
8. Iravani B, Arshamian A, Ravia A, et al. Relationship Between Odor Intensity Estimates and COVID-19 Prevalence Prediction in a Swedish Population. *Chem Senses*. Published online 2020. doi:10.1093/chemse/bjaa034
9. Yale School of Medicine. Yale School of Medicine Jiffy Test of Smell Sensitivity. Published 2020. Accessed July 10, 2020.  
[https://yalesurvey.ca1.qualtrics.com/jfe/form/SV\\_3rzfStiKuEvtQvb](https://yalesurvey.ca1.qualtrics.com/jfe/form/SV_3rzfStiKuEvtQvb)
